# Supplementary material
Source: publisher figshare collection journal article supplement (https://gsajournals.figshare.com/articles/dataset/_/12061659)
Supplement: Supplementary file 1 [file 2]

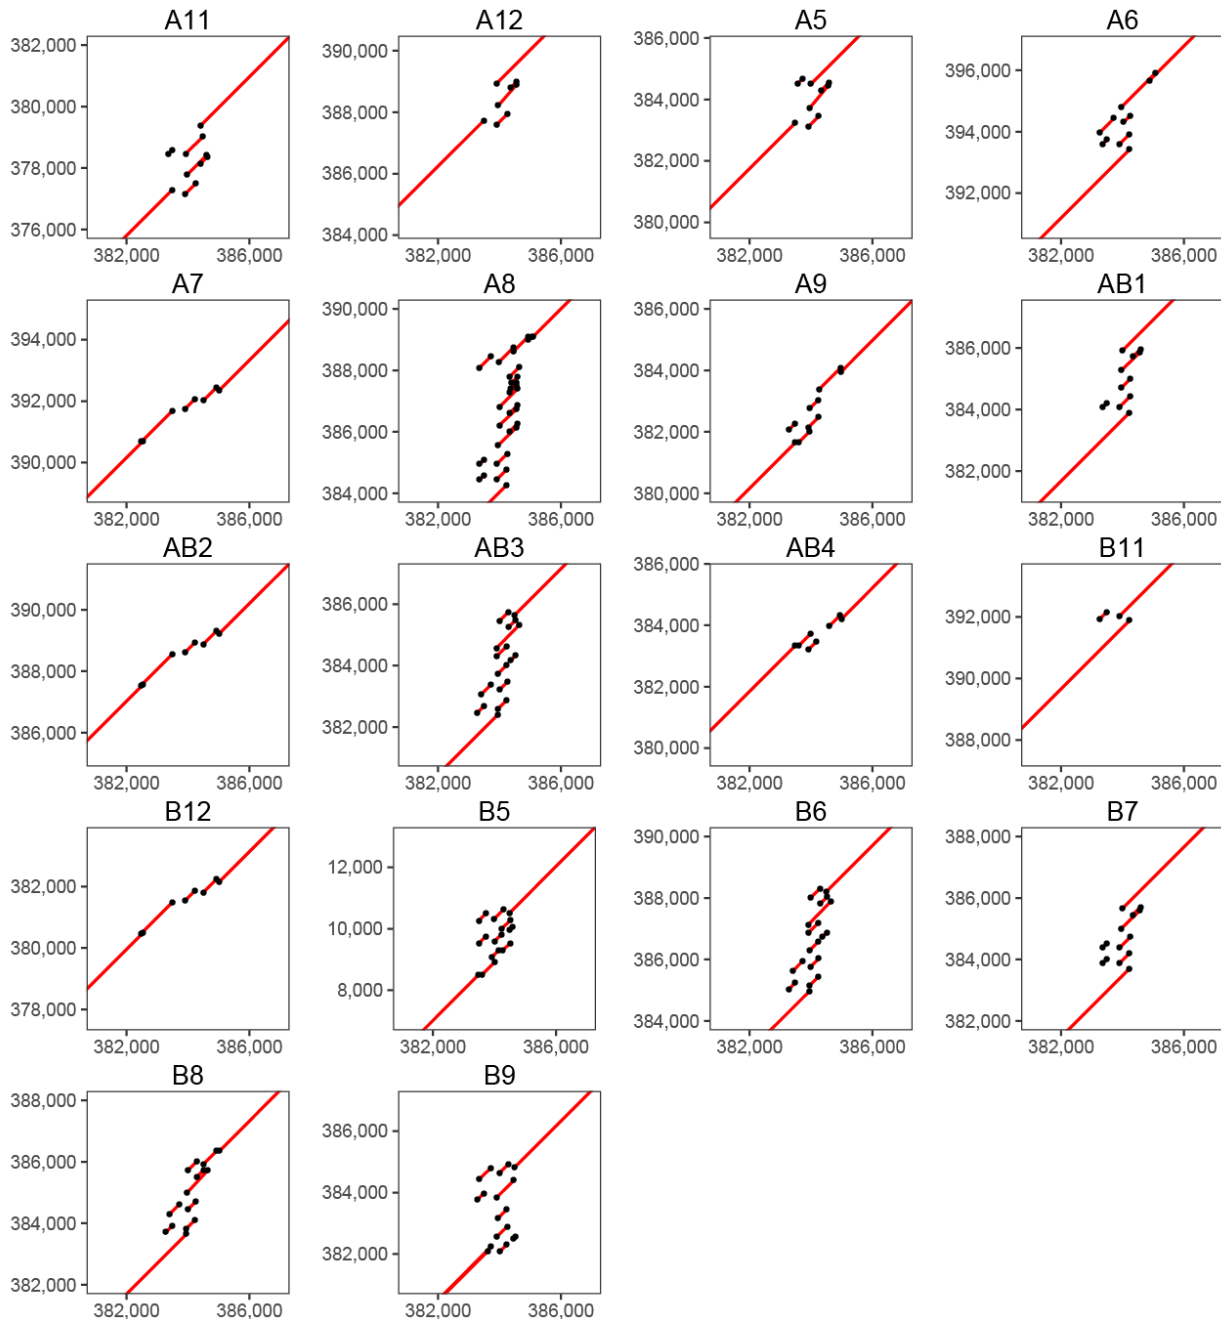

**Figure S1.** Dot plots showing the numerous structural variants present at this particular site on chromosome IV. Each dot plot was constructed by plotting the sequence alignments of regions from each founder strain (y-axis) against the S288C reference strain (x-axis).
