# Supplementary material
Source: publisher figshare collection journal article supplement (https://gsajournals.figshare.com/articles/dataset/_/12061659)
Supplement: Supplementary file 1 [file 2]

## Sheet: Sheet1
Table S3. Specific sporulation conditions used in this study.
Population	Outcrossing Cycle	Sporulation time (in days)	Sporulation volume (in mL)	Sporulation vessel	Additional notes
18F1v1	1	5	200	1L erlenmeyer
18F2v1	2	5	200	1L erlenmeyer
18F3v1	3	5	200	1L erlenmeyer
18F4v1	4	5	200	1L erlenmeyer
18F5v1	5	5	200	1L erlenmeyer
18F6v1	6	5	200	1L erlenmeyer
18F7v1	7	5	200	1L erlenmeyer
18F8v1	8	5	200	1L erlenmeyer
18F9v1	9	5	200	1L erlenmeyer
18F10v1	10	5	200	1L erlenmeyer
18F11v1	11	5	200	1L erlenmeyer
18F12v1	12	5	200	1L erlenmeyer
18F1v2	1	6	4	24DWP	All crosses sporulated separately
18F2v2	2	4	200	1L erlenmeyer
18F3v2	3	3	200	1L erlenmeyer
18F4v2	4	3	50	250mL erlenmeyer
18F5v2	5	4	50	250mL erlenmeyer
18F6v2	6	4	50	250mL erlenmeyer
18F7v2	7	3	50	250mL erlenmeyer
18F8v2	8	4	50	250mL erlenmeyer
18F9v2	9	4	50	250mL erlenmeyer
18F10v2	10	3	50	250mL erlenmeyer
18F11v2	11	4	50	250mL erlenmeyer
18F12v2	12	5	50	250mL erlenmeyer
