# Supplementary material
Source: publisher figshare collection journal article supplement (https://gsajournals.figshare.com/articles/dataset/_/12061659)
Supplement: Supplementary file 2 [file 2]

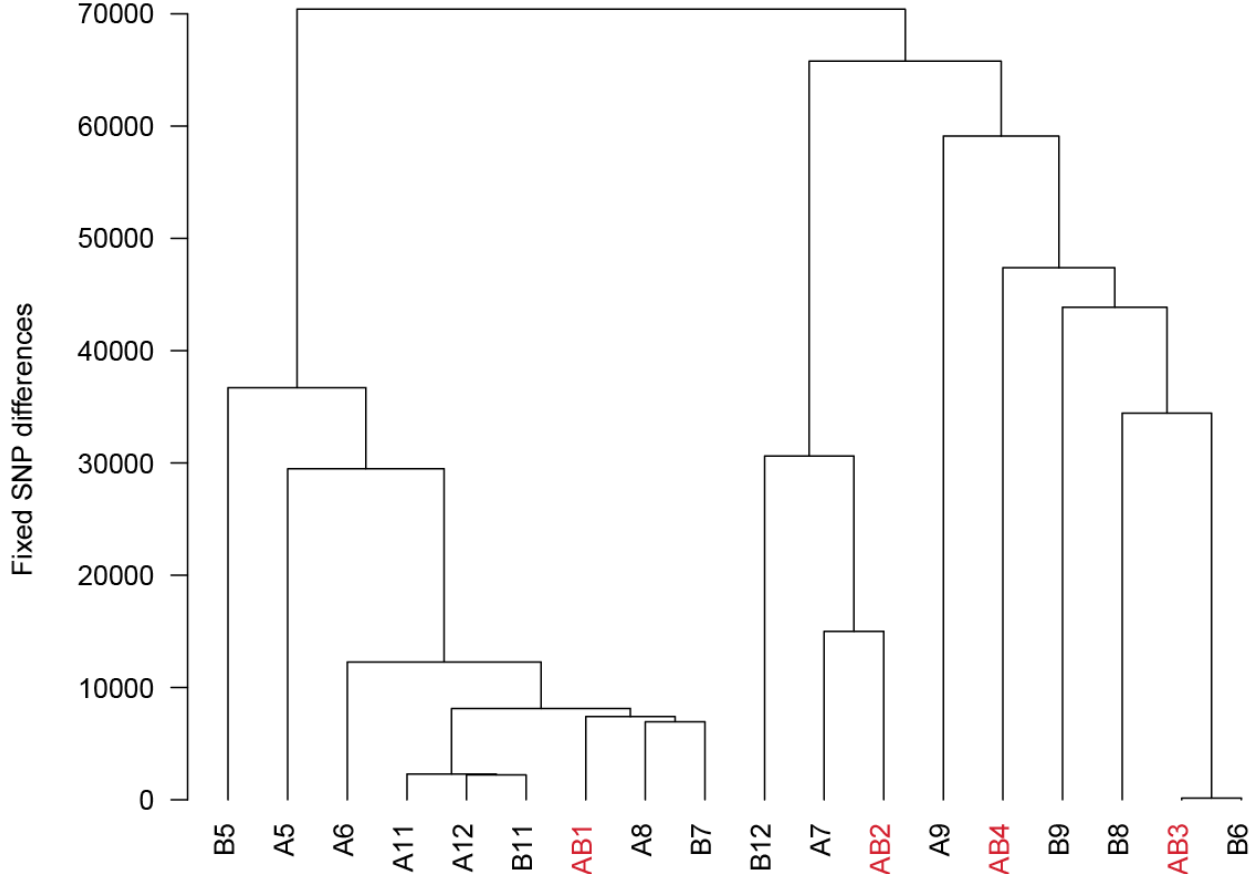

**Figure S2.** Dendrogram showing the degree of relatedness between the 18 founder strains used in this study. This was constructed in *R* using the *hclust* function on a distance matrix representing the number of differences between each pair of founders. Strains colored in red are the founders from the four-way cross described in Cubillos *et al.* and used in (Cubillos *et al.* 2013, 2017).
